# Supplementary material for: XMAP215 and γ-tubulin additively promote microtubule nucleation in purified solutions
Source: PubMed Central journal article supplement — Mol Biol Cell. 2020 Sep 15;31(20):2187–94. doi: 10.1091/mbc.E20-02-0160 (PMC7550701; doi:10.1091/mbc.e20-02-0160), 2020-09-15
Supplement: mbc-31-2187-s001.pdf [file mbc-31-2187-s001.pdf]

# Supplemental Materials

*Molecular Biology of the Cell*

King *et al.*

A

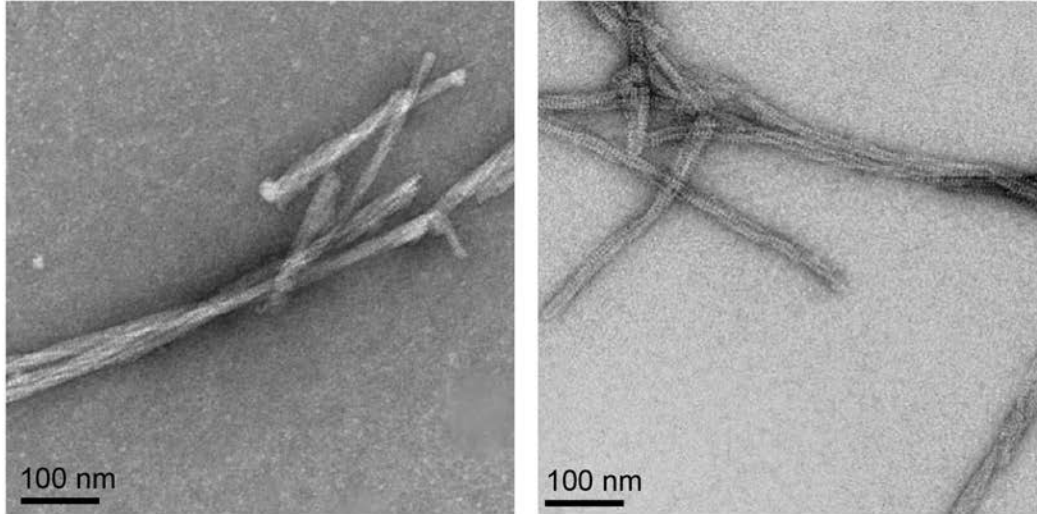

B

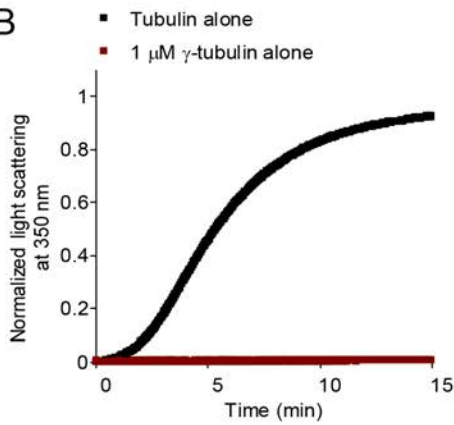

C

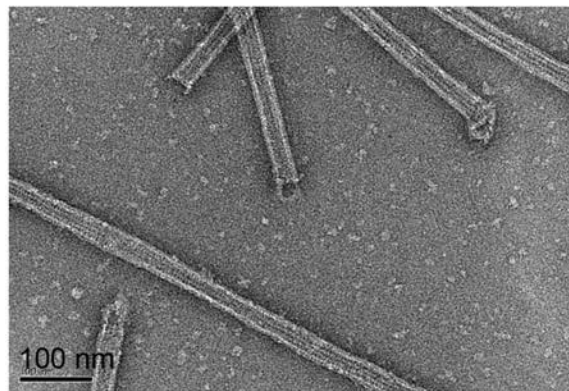

D

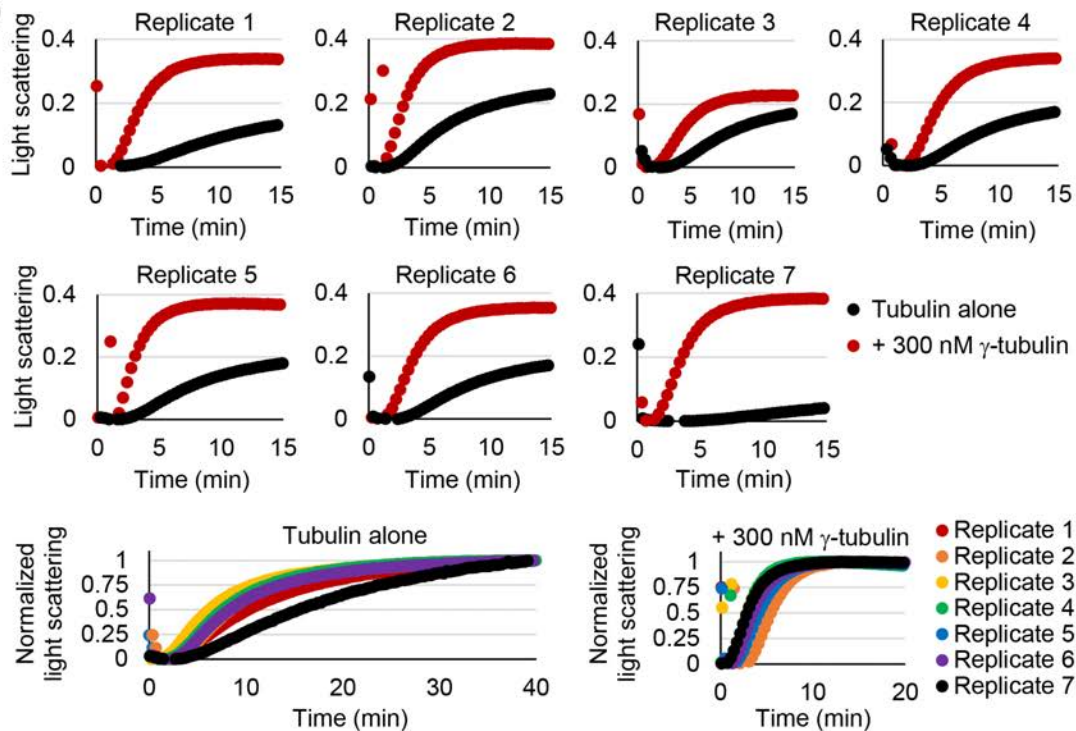

**Supplementary Figure 1.**  $\gamma$ -tubulin arrays promote microtubule formation in a light scattering assay.

**(A)**  $\gamma$ -tubulin oligomerizes to form detectable arrays at 300 nM (left) and 1.1  $\mu$ M (right). At 300 nM  $\gamma$ -tubulin, 6/10 grids had filaments for an average of 0.5  $\mu$ m length of filament/ $\mu$ m<sup>2</sup> of grid. At 80 nM, no filaments were detected in 10 grids.

**(B)** Turbidity assay at 12  $\mu$ M free  $\alpha\beta$ -tubulin or 1  $\mu$ M  $\gamma$ -tubulin, showing that  $\gamma$ -tubulin arrays alone do not scatter light under our experimental conditions. Evidently, they do not scatter light at the low concentrations used ( $\leq 1\mu$ M).

**(C)** Negative-stain electron microscopy image of a sample from a light scattering assay using 1  $\mu$ M  $\gamma$ -tubulin and 5  $\mu$ M  $\alpha\beta$ -tubulin, showing that  $\gamma$ -tubulin arrays support the formation of microtubules, as opposed to other types of tubulin polymers.

**(D)** Raw data for each of 7 replicates at 15  $\mu$ M  $\alpha\beta$ -tubulin. Each experimental reaction with 300 nM  $\gamma$ -tubulin was run simultaneously with a tubulin alone control. Light scattering for each curve was normalized to the maximum plateau value. Nucleation lag was quantified using the corresponding tubulin alone control.

**(E)** Normalized light scattering data for each replicate of tubulin alone and + 300 nM  $\gamma$ -tubulin.

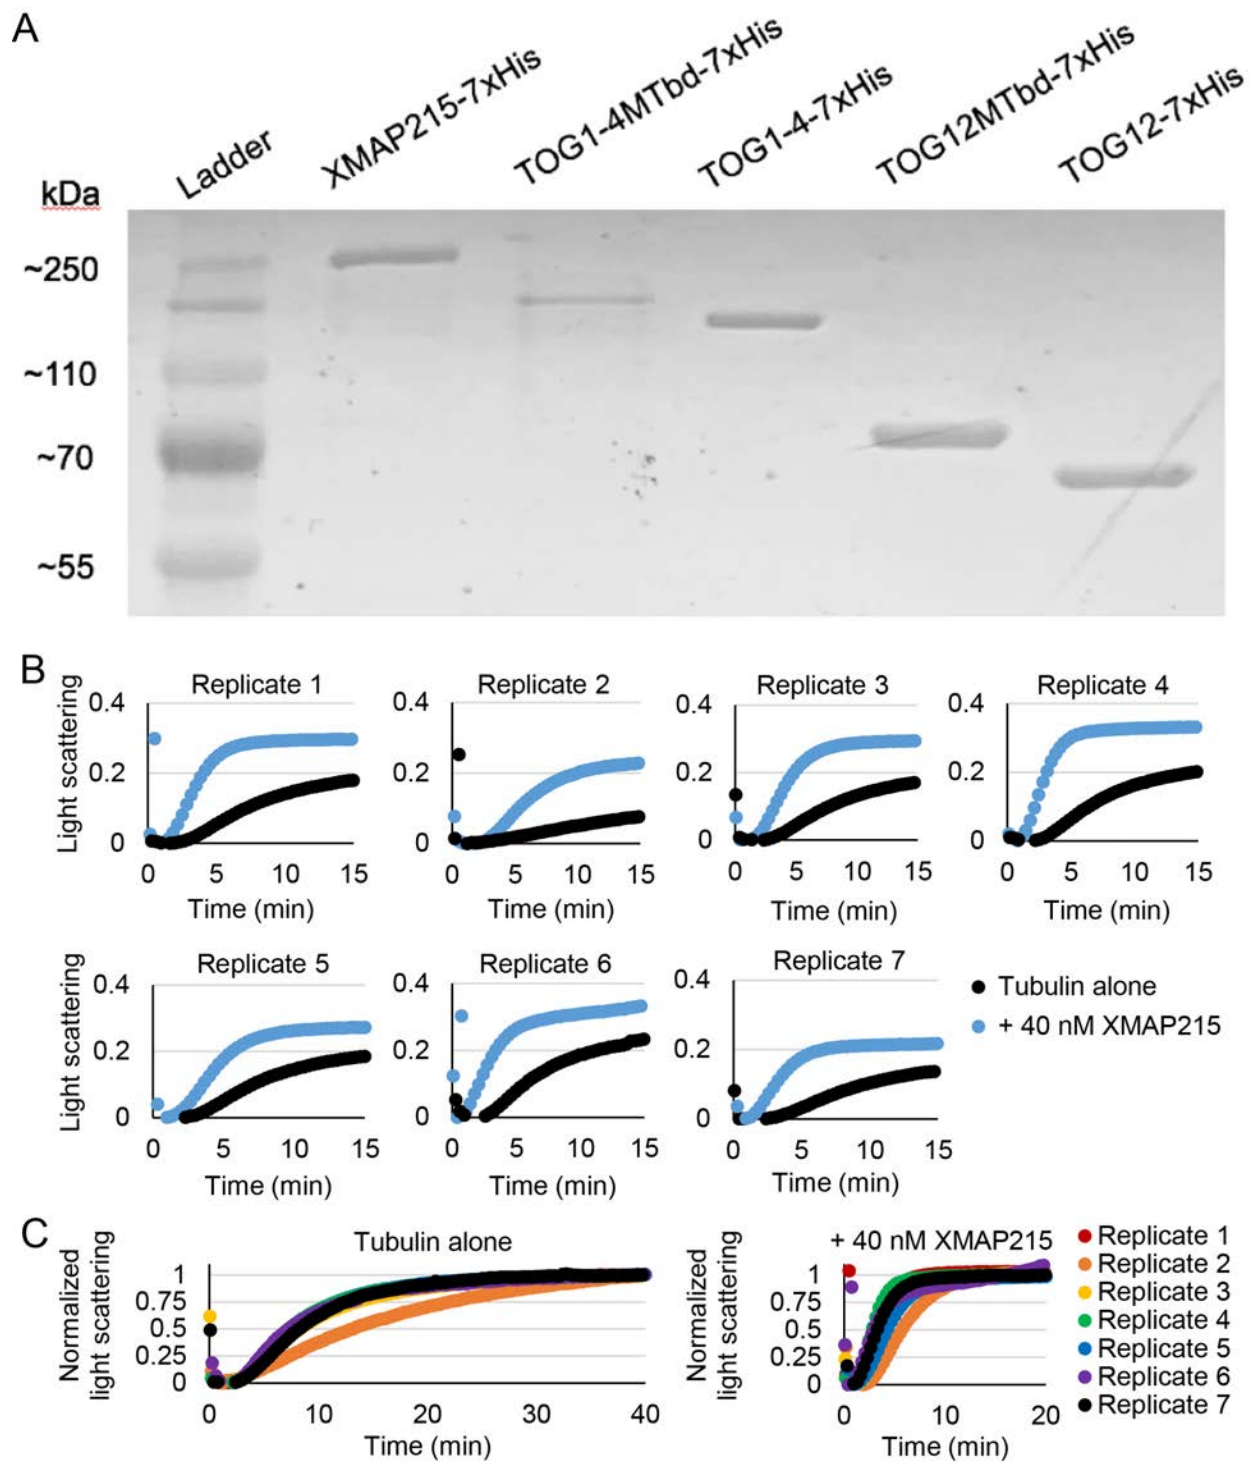

**Supplementary Figure 2. XMAP215 characterization.**

**(A)** SDS-polyacrylamide gel of aliquots (1  $\mu$ g) of purified XMAP215 constructs.

**(B)** Raw data for each of 7 replicates at 15  $\mu$ M  $\alpha\beta$ -tubulin. Each experimental reaction with 40 nM XMAP215 was run simultaneously with a tubulin alone control. Light

scattering for each curve was normalized to the maximum plateau value. Nucleation lag was quantified using the corresponding tubulin alone control.

**(C)** Normalized light scattering data for each replicate of tubulin alone and + 40 nM XMAP215.

| Condition                  | Normalized nucleation lag |                                                                |            |
|----------------------------|---------------------------|----------------------------------------------------------------|------------|
| Tubulin alone              | 1                         | Normalized nucleation lag with 300 nM $\gamma$ -tubulin alone: | 0.507      |
| + 300 nM $\gamma$ -tubulin | 0.507                     | Normalized nucleation lag with 20 nM XMAP215 alone:            | x<br>0.749 |
| + 20 nM XMAP215            | 0.749                     | Predicted additive effect:                                     | 0.380      |

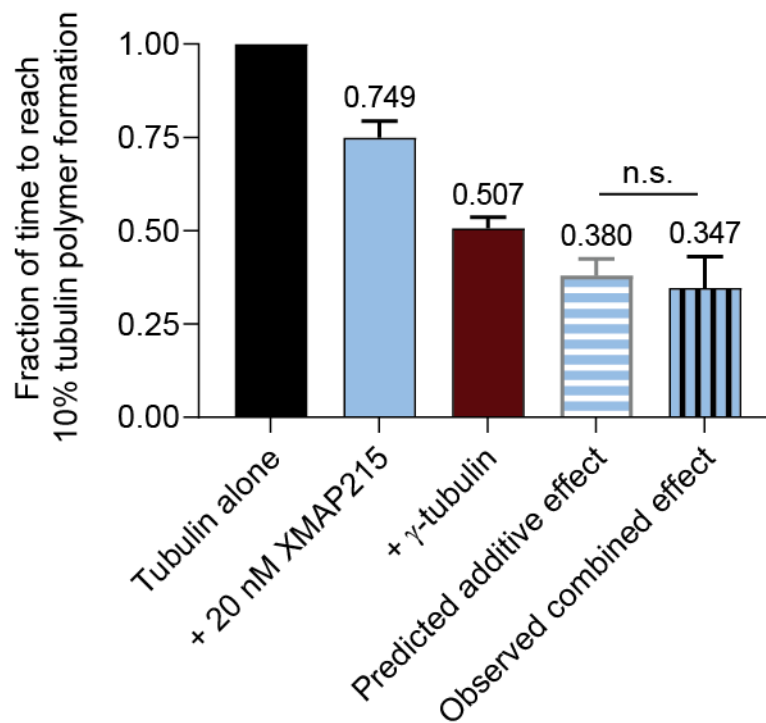

**Supplementary Figure 3.** Example calculation for predicted additive effect.

Data plotted are mean values  $\pm$  SEM (N = 12 for tubulin alone, N = 4 for all other conditions). Significance was tested, two-sided t-test.

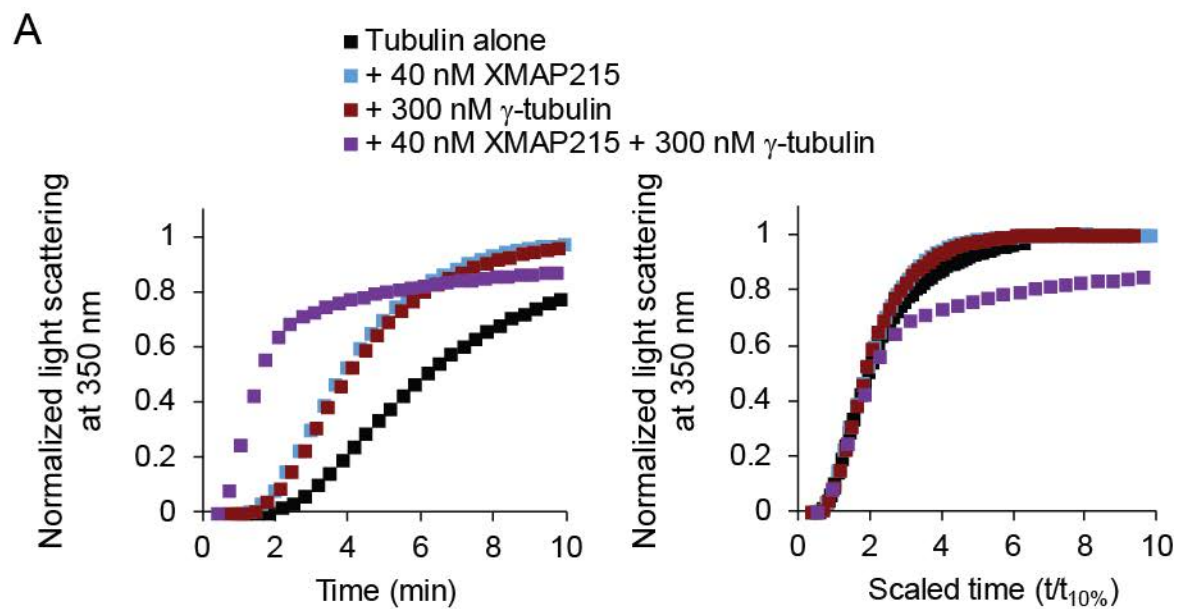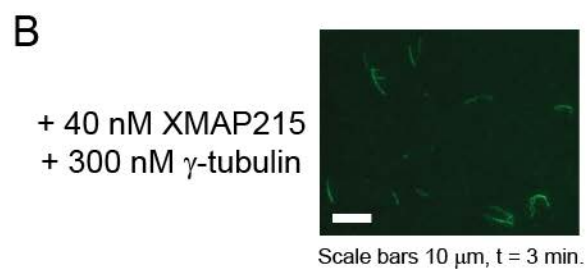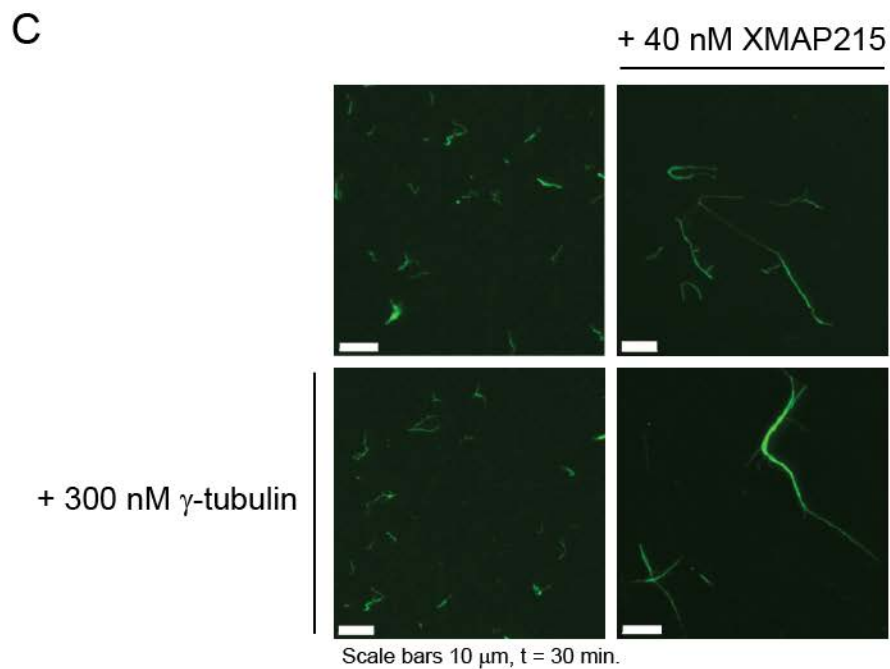

**Supplementary Figure 4.** XMAP215 and  $\gamma$ -tubulin in combination promote microtubule bundling.

Historically, the mechanism of spontaneous tubulin assembly has been explored using the turbidity data across a range of initial tubulin concentrations [3]. Flyvbjerg and coworkers normalized light scattering to the maximum value at which the data plateaus and normalized time to the time at which turbidity reaches one-tenth its maximum. Finding that the curves were identical following these normalizations, they determined that tubulin follows a single mechanism during assembly, regardless of initial concentration.

We applied this type of analysis to explore the mechanism of assembly in the presence of  $\gamma$ -tubulin and XMAP215. When  $\gamma$ -tubulin is added at 300 nM in combination with XMAP215 at sufficiently high concentration (~40 nM), light scattering increases indefinitely. Normalization of the light scattering of this condition results in a curve with differing shape, specifically with a distinct linear increase in light scattering after turbidity reaches 60% of its maximum value, after approximately 2 min (Supplementary Figure 4A).

To determine if the species of microtubules were different when both  $\gamma$ -tubulin and XMAP215 were present, we performed microtubule pelleting at various time points. By the earliest time point of 3 min, small ( $\leq 10$  microns) microtubule bundles were rare but visible (Supplementary Figure 4B). By the latest time point of 30 min, most microtubules were present in bundles (Supplementary Figure 4C).

The combination of  $\gamma$ -tubulin and XMAP215 in purified solutions promotes bundling of existing microtubules, as noted previously [25]. Comparisons for the effect on nucleation are taken when turbidity reaches 10% of its maximum value, well before bundling occurs.
